# Supplementary material for: Enhancing the optoelectronic properties of solution-processed AgInSe2 thin films for application in photovoltaics
Source: Royal Society of Chemistry journal article supplement (doi:10.1039/d3tc03540a), 2023-12-07
Supplement: d3tc03540a1.pdf [file d3tc03540a1.pdf]

Supplementary Information

**Enhancing the Optoelectronic Properties of Solution-Processed  
AgInSe<sub>2</sub> Thin Films for Application in Photovoltaics**

Shubhanshu Agarwal<sup>a</sup>, Kyle Weidemann<sup>a</sup>, David Rokke<sup>a</sup>, Kiruba Catherine Vincent<sup>a</sup>, Dmitry Zemlyanov<sup>b</sup>, and Rakesh Agrawal<sup>a,\*</sup>

<sup>a</sup>Davidson School of Chemical Engineering, Purdue University, West Lafayette, Indiana 47907, United States

<sup>b</sup>Birck Nanotechnology Center, Purdue University, West Lafayette, Indiana 47907, United States

\*Rakesh Agrawal – Davidson School of Chemical Engineering, Purdue University, West Lafayette, Indiana 47907, United States

Email: agrawalr@purdue.edu

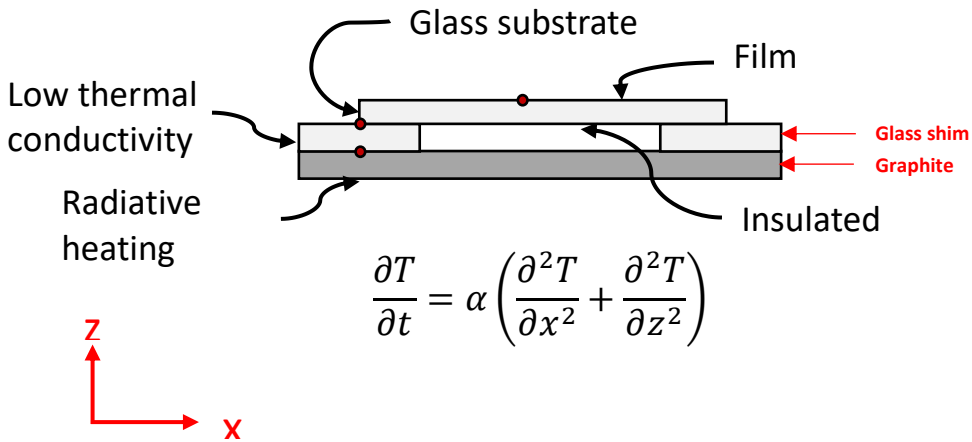

**Figure S1.** Schematic of the configuration modeled for the heat transfer calculations with the boundary conditions used (red dots indicate the points at which temperatures are plotted in Figure S2).

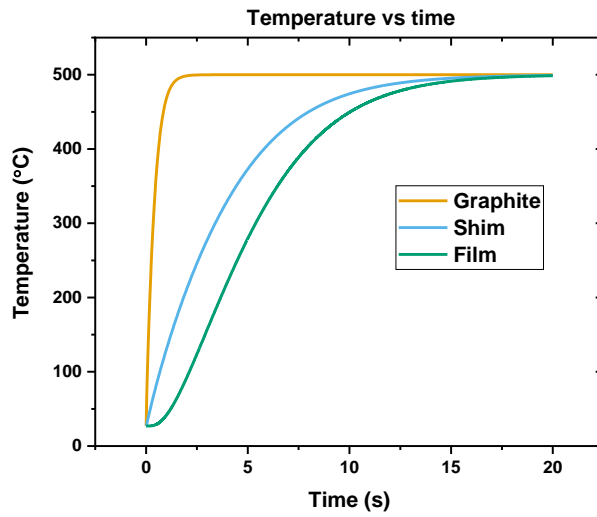

**Figure S2.** Temperature variation at the 3 points indicated in Figure S1 with time upon exposure to the surrounding maintained at 500 °C.

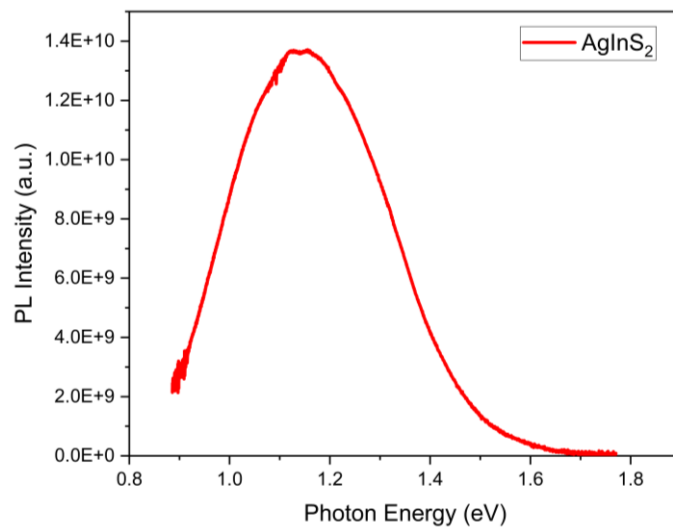

**Figure S3.** Photoluminescence plot of as-coated AgInS<sub>2</sub> film. The peak position at around 1.18 eV may correspond to some Ag<sub>2</sub>S impurity.

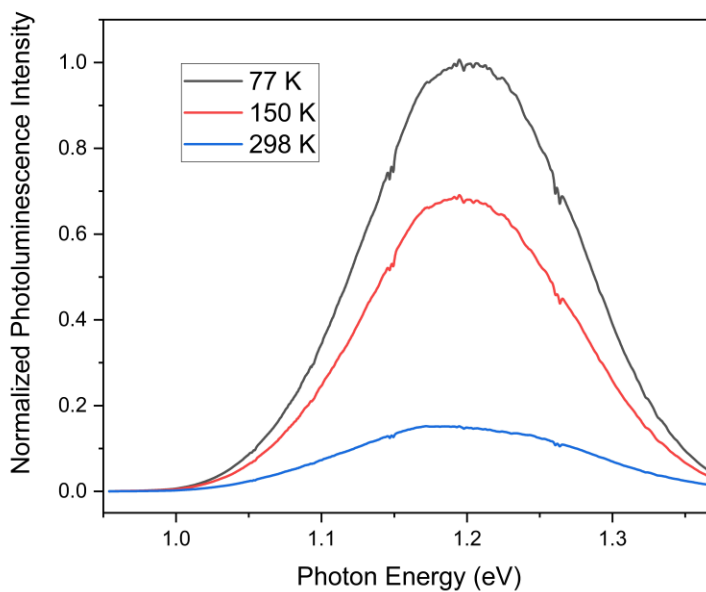

**Figure S4.** Variable temperature PL for the as-coated AgInS<sub>2</sub> film shows that the midgap peak PL intensity increased at low temperatures with a blue shift.

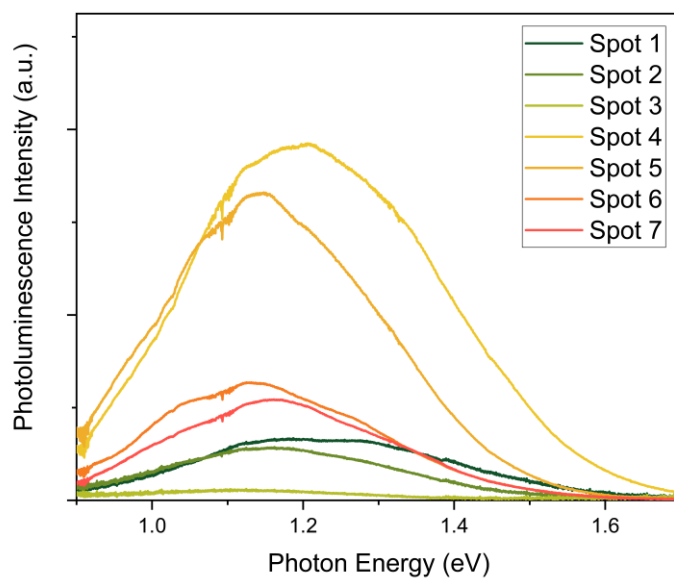

**Figure S5.** The midgap PL peak for the AgInS<sub>2</sub> film varied from spot to spot between 1.17 eV to 1.25 eV.

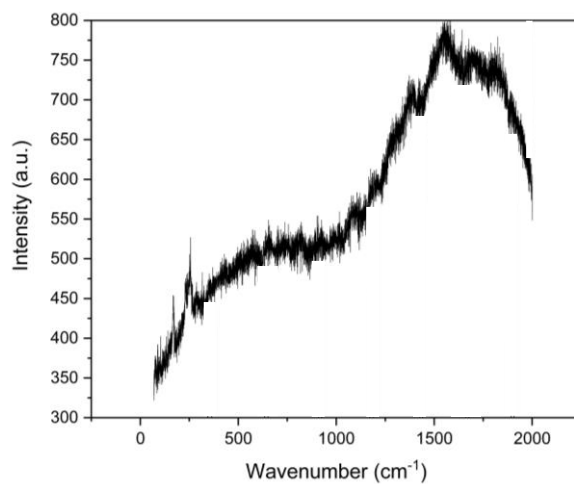

**Figure S6.** Raman spectrum shows the presence of residual amorphous carbon in the AgInSe<sub>2</sub> film after regular selenization of the Stoichiometric AgInSe<sub>2</sub> film prepared from DMF-TU-Chlorides ink.

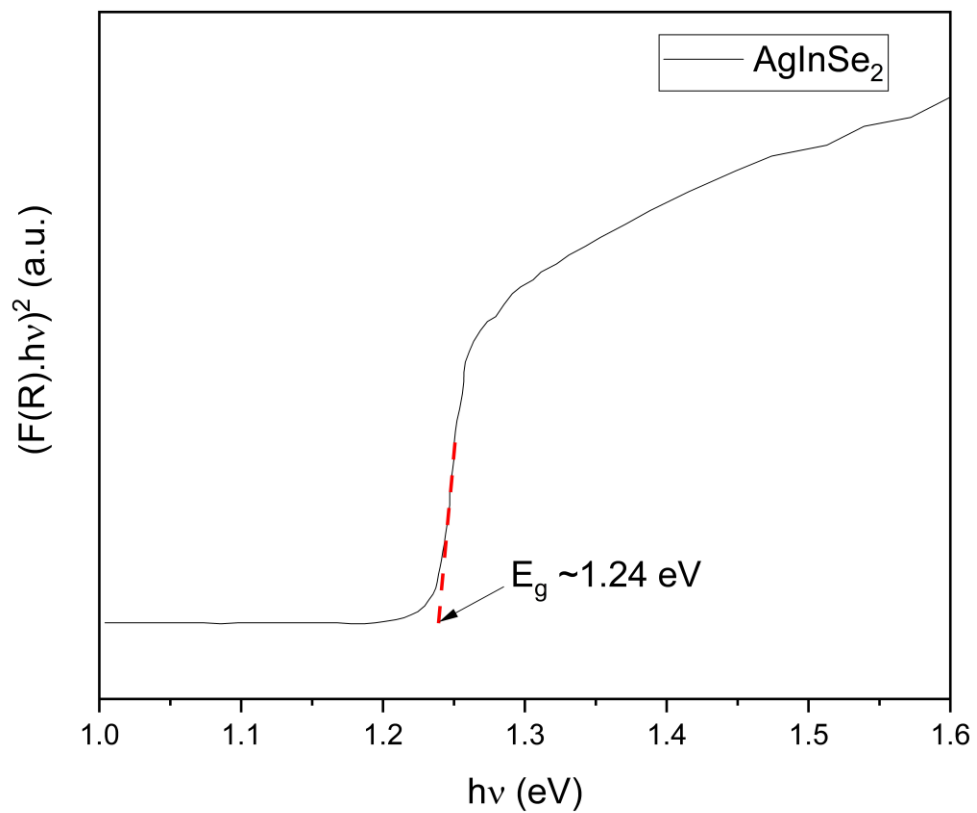

**Figure S7.** Bandgap of AgInSe<sub>2</sub> film obtained from the Kubelka-Munk transformation on diffuse reflectance spectra.

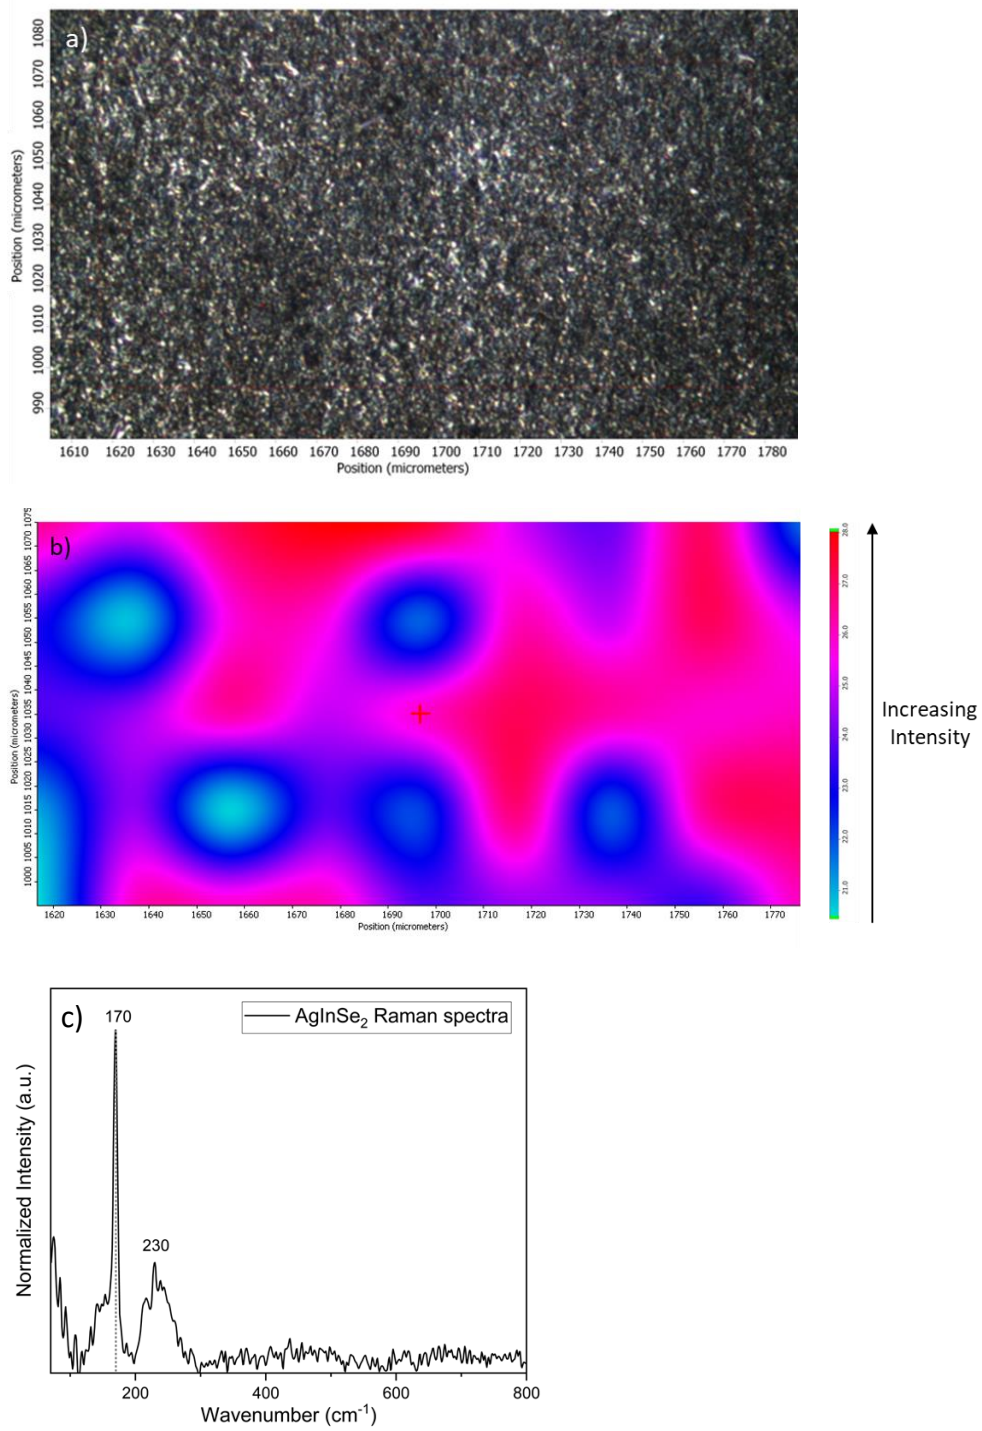

**Figure S8.** Raman mapping of the AgInSe<sub>2</sub> film selenized on shims at 515 °C, a) Optical Image of the screened portion of AgInSe<sub>2</sub> film, b) Intensity map of 170 cm<sup>-1</sup> peak, and c) Raman spectrum.

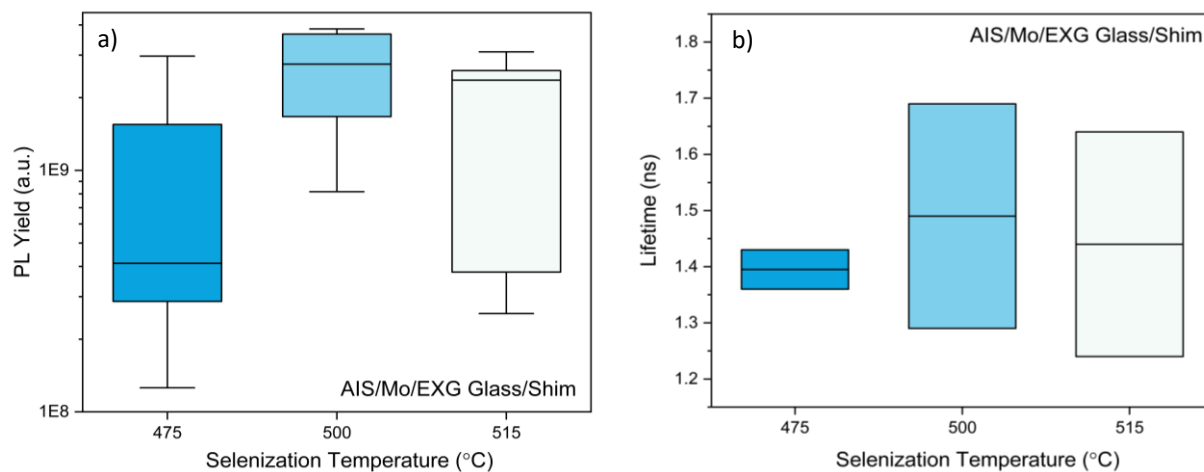

**Figure S9.** a) PL yield variation, b) Carrier lifetime variation with selenization temperature for the AgInSe<sub>2</sub> films selenized on shims with Molybdenum back contact.

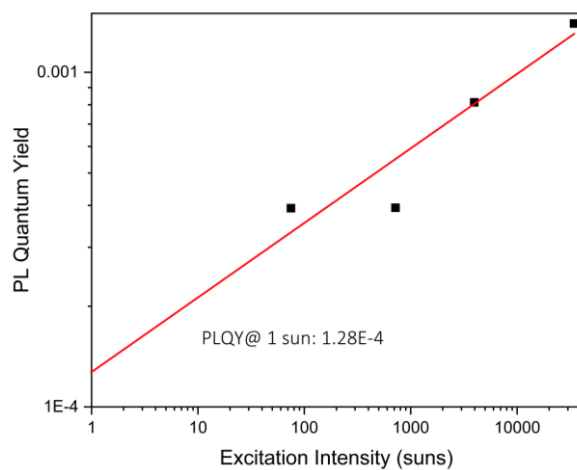

**Figure S10.** Plot showing the variation of the PLQY at different excitation intensities for the AgInSe<sub>2</sub> film on alumina coated EXG glass selenized at 515 °C on shims. The fitted curve was extrapolated to one-sun to estimate the PLQY at one-sun.

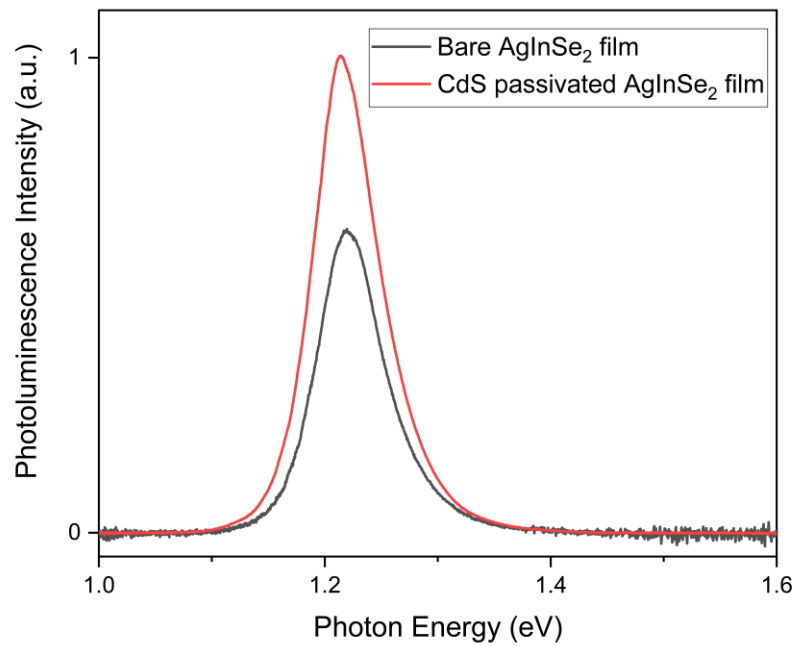

**Figure S11.** Comparison of the PL peak intensities for the AgInSe<sub>2</sub> films selenized with and without CdS passivation.

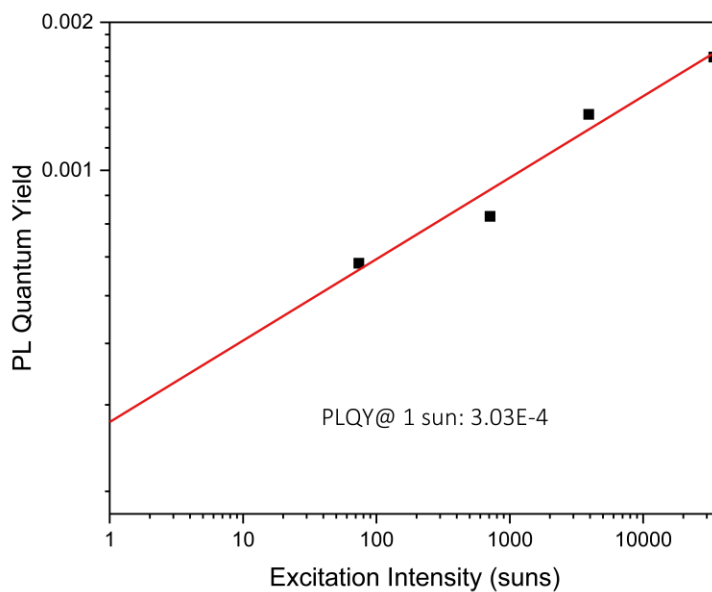

**Figure S12.** Plot showing the variation of the PLQY at different excitation intensities for the AgInSe<sub>2</sub> film passivated with CdS, deposited on alumina coated EXG glass and selenized at 515 °C on shims. The fitted curve was extrapolated to one-sun to estimate the PLQY at one-sun.



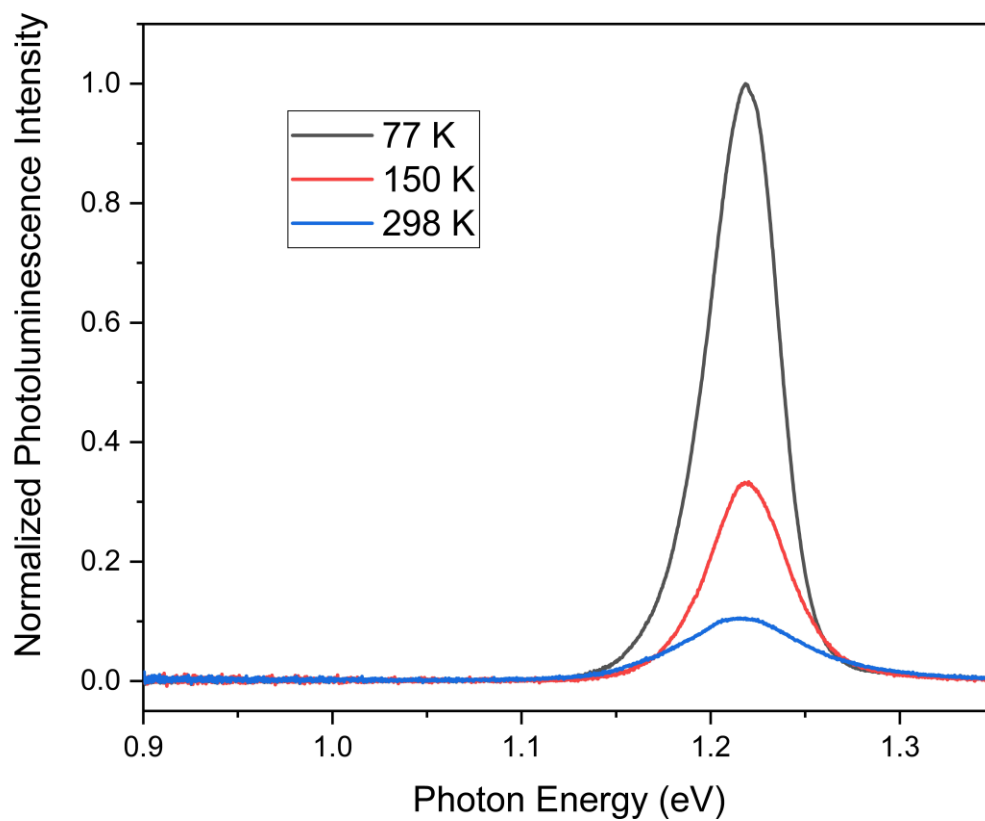

**Figure S13.** Variable temperature PL for the AgInSe<sub>2</sub> film selenized on shims shows that the band-to-band PL peak intensity increased at low temperatures.

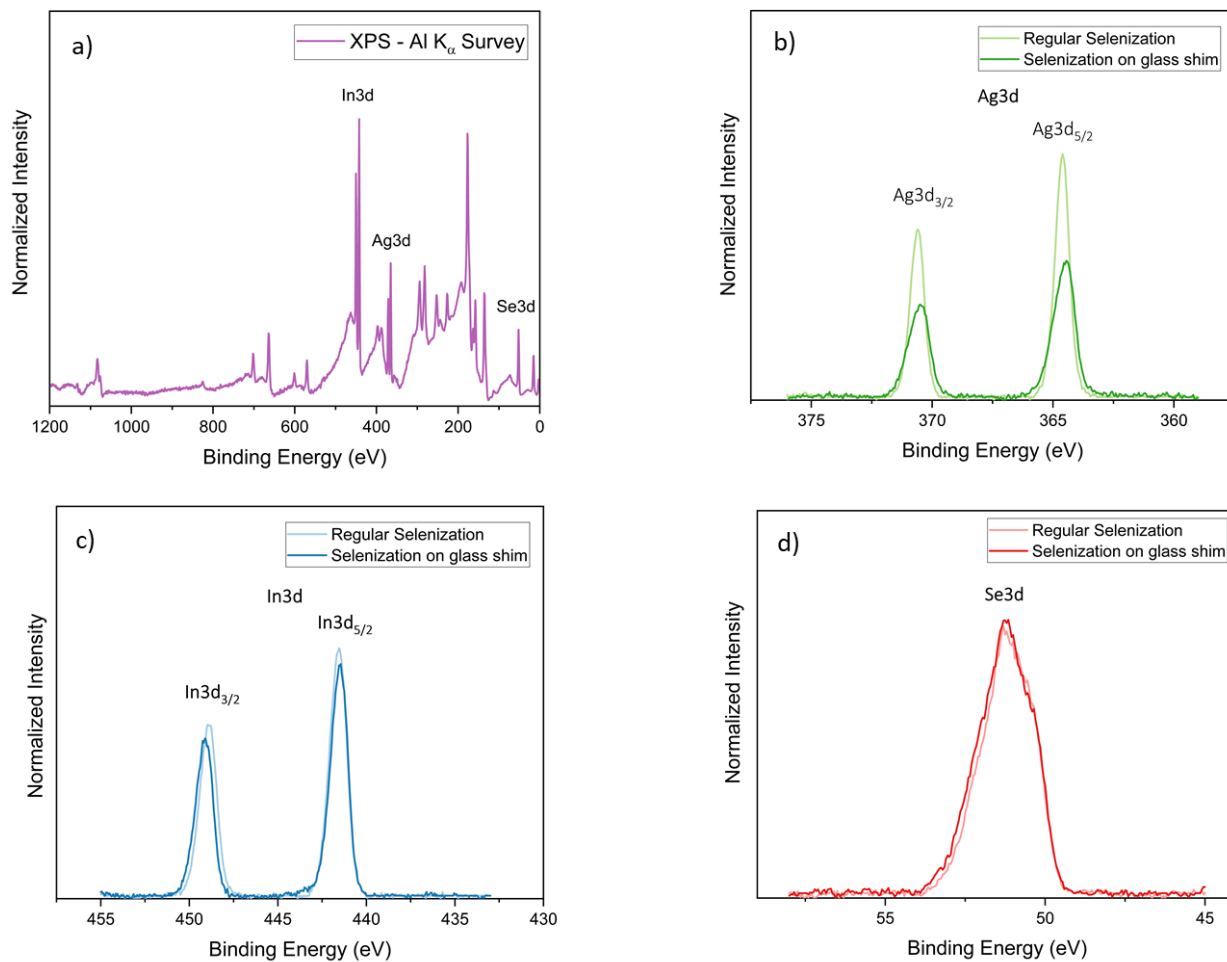

**Figure S14.** a) Full XPS spectra of AgInSe<sub>2</sub> film selenized on shims, b) Comparison of the Ag3d, c) Comparison of the In3d, and d) Comparison of the Se3d peaks for the AgInSe<sub>2</sub> films selenized at 515 °C without and with shims.

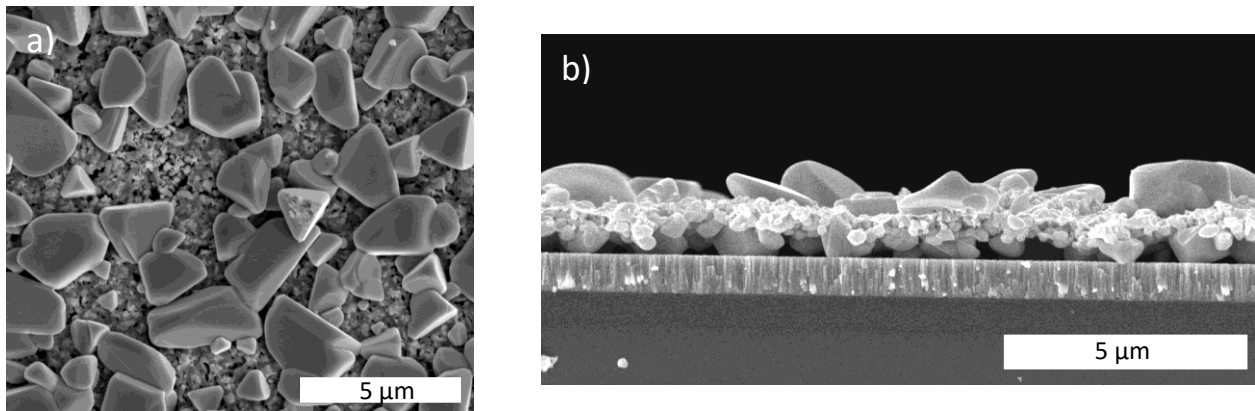

**Figure S15.** a) SEM top-view, b) SEM cross-sectional view of AgInSe<sub>2</sub> film selenized at 515 °C on shims with Mo back contact.

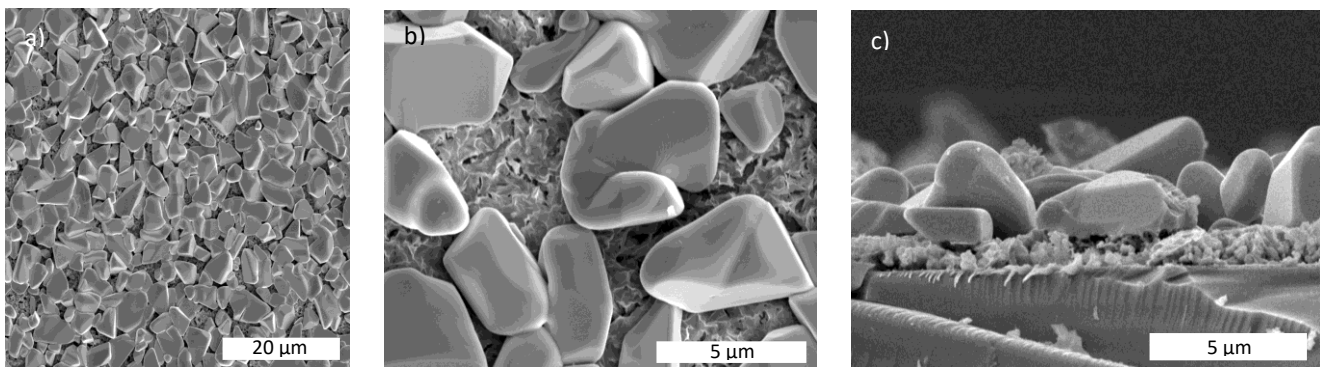

**Figure S16.** a) SEM top-view at low magnification, b) SEM top-view at high magnification c) SEM cross-sectional view of AgInSe<sub>2</sub> film selenized at 515 °C on shims with Alumina back contact. There is layer of fine AgInSe<sub>2</sub> grains at the bottom of the film.

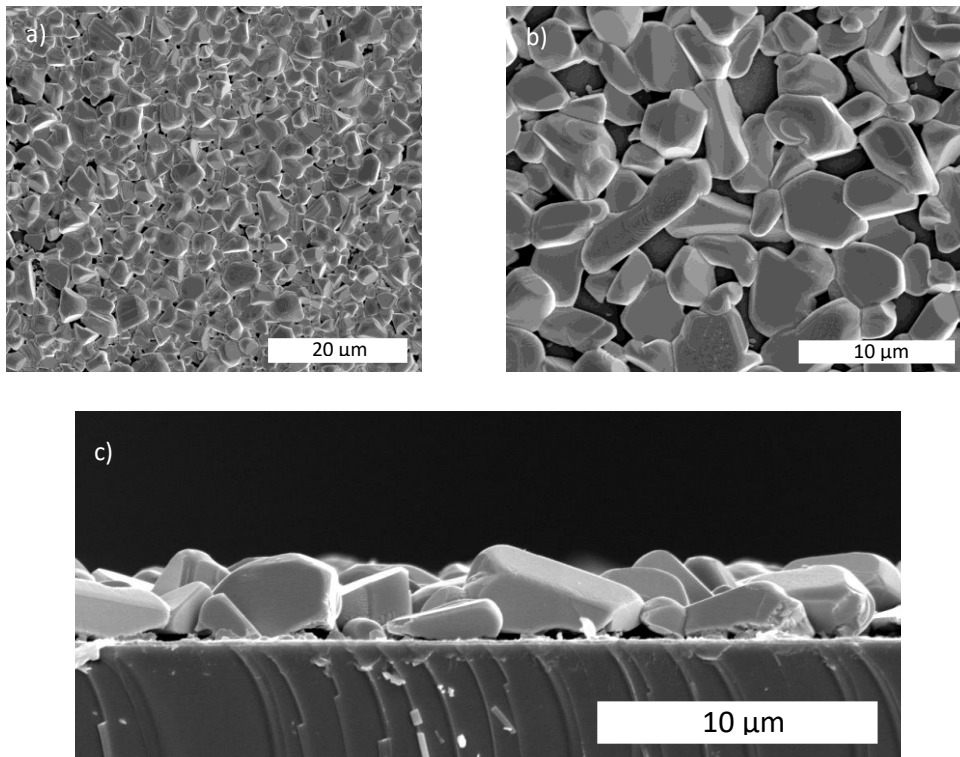

**Figure S17.** a) SEM top-view at low magnification, b) SEM top-view at high magnification c) SEM cross-sectional view of AgInSe<sub>2</sub> film selenized at 600 °C on shims with Alumina back contact.

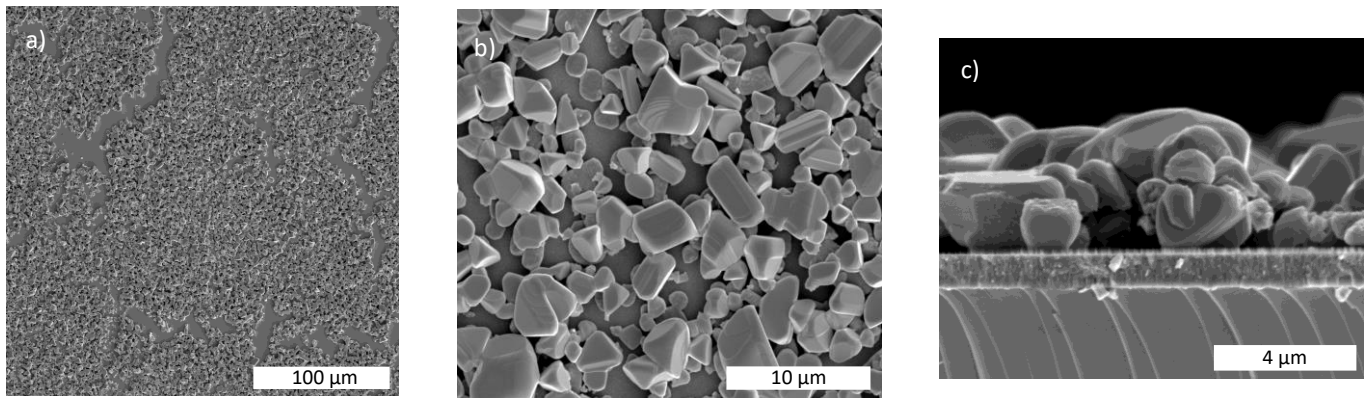

**Figure S18.** a) SEM top-view at low magnification, b) SEM top-view at high magnification c) SEM cross-sectional view of AgInSe<sub>2</sub> film selenized at 600 °C on shims with Mo back contact.

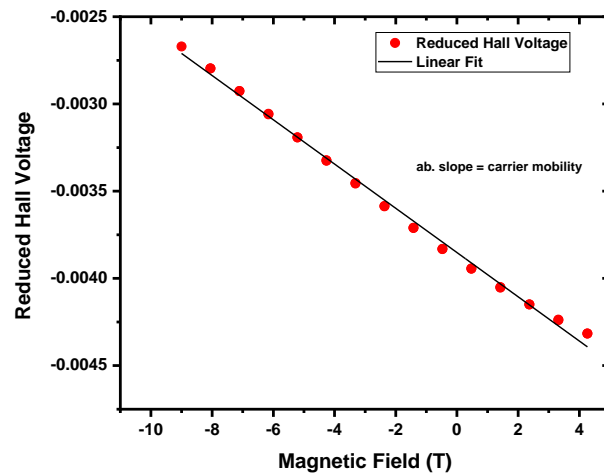

**Figure S19.** Plot showing the variation of the reduced Hall voltage with the magnetic field. The slope of the curve represents the carrier mobility.
